# Supplementary material
Source: MDPI journal article supplement (https://www.mdpi.com/2076-3417/14/10/4277)
Supplement: s1 [file s1]

# Supplementary Data for

## Identifying p56<sup>lck</sup> SH2 Domain Inhibitors Using Molecular Docking and In Silico Scaffold Hopping

Priyanka Samanta <sup>1</sup> and Robert J. Doerksen <sup>1,2,\*</sup>

<sup>1</sup> Department of BioMolecular Sciences, School of Pharmacy, University of Mississippi, Oxford, MS 38677-1848, USA; psamanta@go.olemiss.edu

<sup>2</sup> Research Institute of Pharmaceutical Sciences, School of Pharmacy, University of Mississippi, Oxford, MS 38677-1848, USA

\* Correspondence: rjd@olemiss.edu; Tel.: +1-622-915-7052

| Hypotheses | Survival<br>score | Site<br>score | Vector<br>score | Volume<br>score | BEDROC<br>score | Phase<br>hypo<br>score |
|------------|-------------------|---------------|-----------------|-----------------|-----------------|------------------------|
| DHRRR_1    | 6.143             | 0.909         | 0.824           | 0.824           | 0.997           | 1.365                  |
| AHRRR_2    | 6.014             | 0.915         | 0.821           | 0.821           | 1.000           | 1.361                  |
| ADHRR_2    | 5.998             | 0.905         | 0.823           | 0.823           | 1.000           | 1.360                  |
| AHRRR_1    | 6.018             | 0.919         | 0.830           | 0.830           | 0.998           | 1.359                  |
| ADHRR_5    | 5.971             | 0.910         | 0.814           | 0.814           | 1.000           | 1.358                  |
| ADHRR_4    | 5.977             | 0.894         | 0.822           | 0.822           | 0.999           | 1.358                  |
| ADHRR_1    | 6.000             | 0.872         | 0.797           | 0.797           | 0.998           | 1.358                  |
| AHRRR_3    | 5.982             | 0.906         | 0.827           | 0.827           | 0.999           | 1.358                  |
| ADHRR_6    | 5.931             | 0.870         | 0.799           | 0.799           | 0.999           | 1.355                  |

|         |       |       |       |       |       |       |
|---------|-------|-------|-------|-------|-------|-------|
| ADHRR_3 | 5.992 | 0.885 | 0.789 | 0.789 | 0.993 | 1.353 |
| AHRR_2  | 5.557 | 0.921 | 0.816 | 0.816 | 1.000 | 1.333 |
| DHRR_1  | 5.647 | 0.918 | 0.816 | 0.816 | 0.994 | 1.333 |
| HRRR_1  | 5.612 | 0.926 | 0.828 | 0.828 | 0.996 | 1.333 |
| DHRR_3  | 5.579 | 0.940 | 0.810 | 0.810 | 0.997 | 1.332 |
| DRRR_1  | 5.527 | 0.946 | 0.823 | 0.823 | 1.000 | 1.332 |
| DHRR_2  | 5.647 | 0.906 | 0.823 | 0.823 | 0.993 | 1.331 |
| AHRR_1  | 5.563 | 0.914 | 0.829 | 0.829 | 0.997 | 1.331 |
| AHRR_3  | 5.552 | 0.924 | 0.815 | 0.815 | 0.997 | 1.330 |
| AHRR_4  | 5.548 | 0.941 | 0.824 | 0.824 | 0.973 | 1.306 |
| AHRR_5  | 5.546 | 0.924 | 0.828 | 0.828 | 0.961 | 1.294 |

**Table S1.** The generated e-pharmacophore models and their features. The hypothesis shown in bold is the top ligand-based e-pharmacophore that is used for further studies in this work.

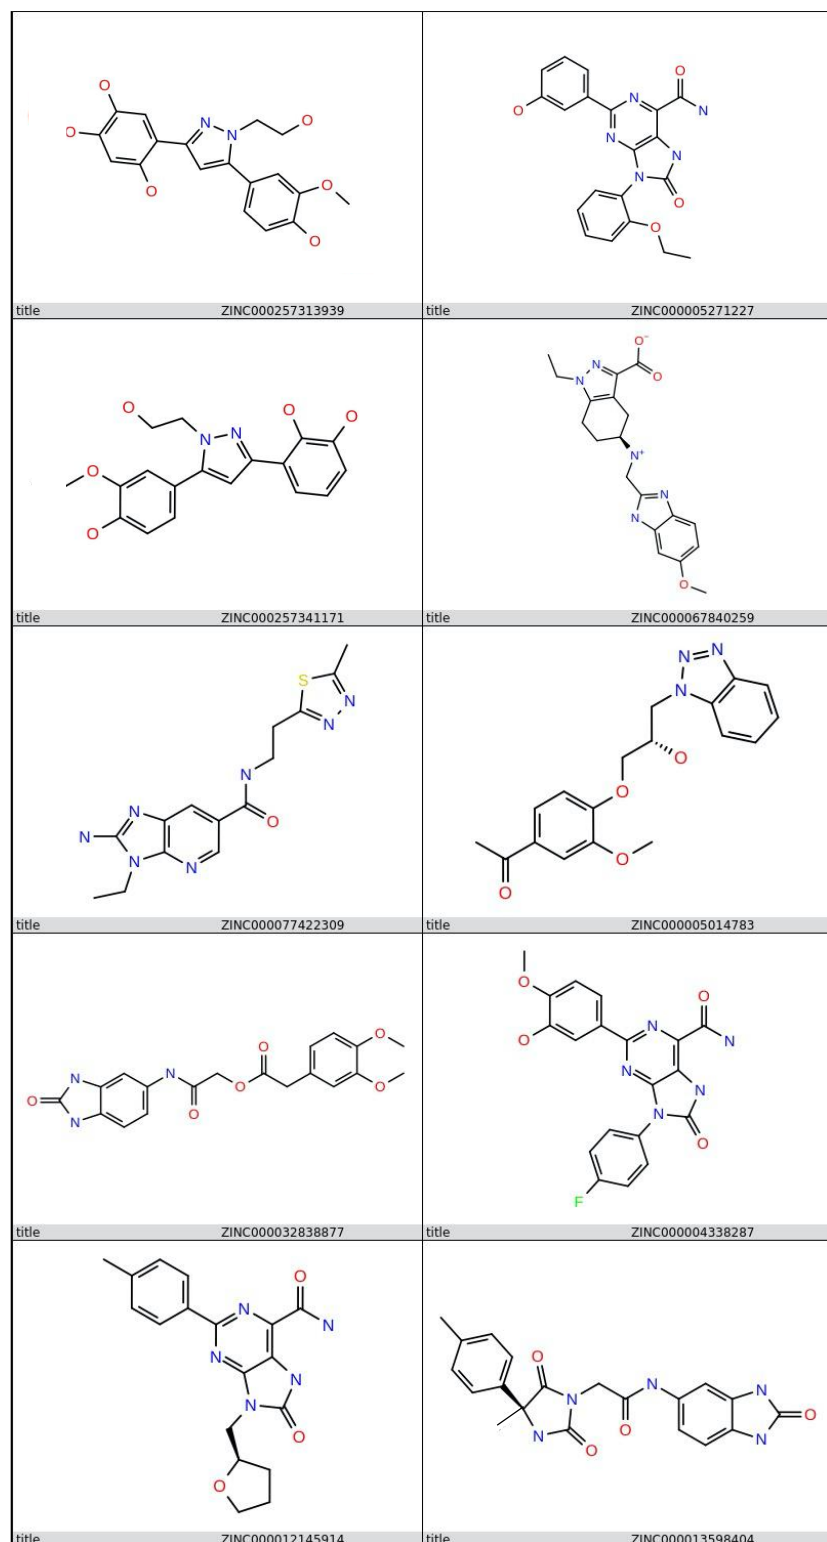

**Figure S1.** 2D-structures of the top 10 hits from the pool of 202 ligands that were obtained from the virtual screening docking protocol adopted in this study.

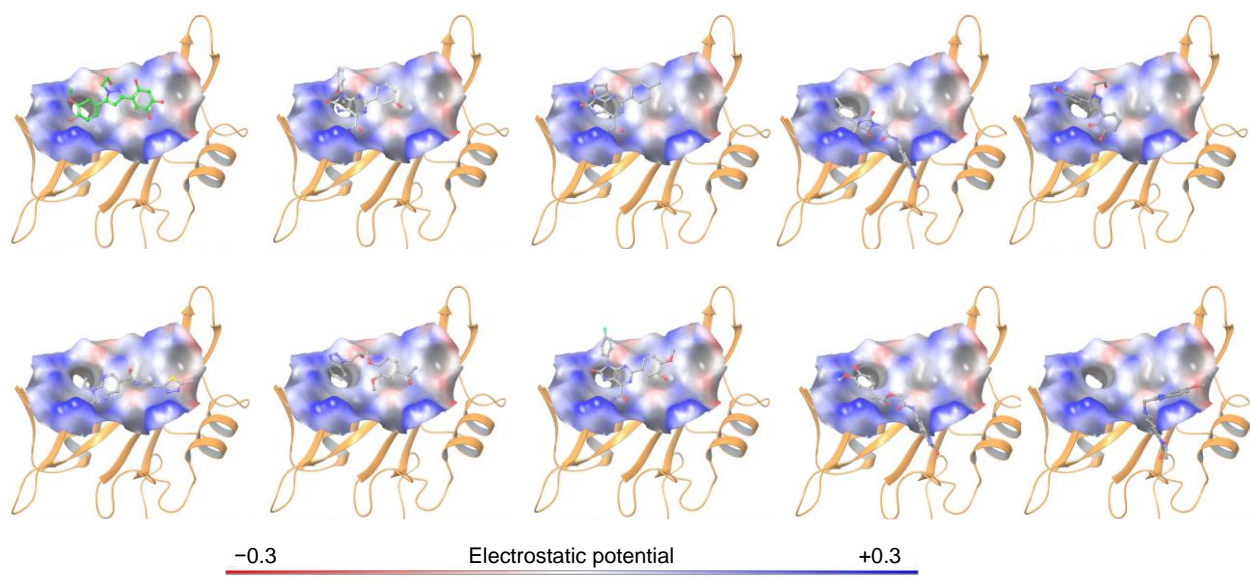

**Figure S2.** Docked structures of the top 10 hits from the pool of 202 ligands that were obtained from the virtual screening docking protocol adopted in this study. The ligand binding pocket is shown in surface representation. The ligands are shown in gray licorice. The best hit is shown in the first panel in green licorice.

## SMILES strings and unique ZINC IDs of the 202 molecules mentioned in the report

COc1cc(ccc1O)-c2cc(nn2CCO)-c3cc(O)c(O)cc3O ZINC000257313939  
CCOc1cccc1-n(c(=O)[nH]2)c(c23)nc(nc3C(=O)N)-c4cccc(O)c4 ZINC000005271227  
COc1cc(ccc1O)-c2cc(nn2CCO)-c3cccc(O)c3O ZINC000257341171  
O=C([O-])c1nn(CC)c(c12)CC[C@@H](C2)[NH2+]Cc(n3)[nH]c(c34)cc(cc4)OC  
ZINC000067840259  
CCn(c(n1)N)c(c12)ncc(c2)C(=O)NCCc3nnc(s3)C ZINC000077422309  
COc1cc(C(=O)C)ccc1OC[C@@H](O)Cn(nn2)c(c23)cccc3 ZINC000005014783  
COc1ccc(cc1OC)CC(=O)OCC(=O)Nc(cc2)cc(c23)[nH]c(=O)[nH]3 ZINC000032838877  
COc1ccc(cc1O)-c(nc2C(=O)N)nc(c23)n(c(=O)[nH]3)-c4ccc(F)cc4 ZINC000004338287  
Cc1ccc(cc1)-c(nc2C(=O)N)nc(c23)n(c(=O)[nH]3)C[C@@H]4CCCCO4 ZINC000012145914  
Cc1ccc(cc1)[C@]2(C)NC(=O)N(C2=O)CC(=O)Nc(cc3)cc(c34)[nH]c(=O)[nH]4  
ZINC000013598404  
CCn(c(n1)N)c(c12)ncc(c2)C(=O)NCCn(nc3)c(=O)c(c34)cccc4 ZINC000077487240  
Cc1ccc(cc1C)-n(c(=O)[nH]2)c(c23)nc(nc3C(=O)N)-c4cccc4O ZINC000005143559  
COc1cccc1-n(c(=O)[nH]2)c(c23)nc(nc3C(=O)N)-c4cccc(O)c4 ZINC000004338344  
CCn(c(n1)N)c(c12)ncc(c2)C(=O)NCCc(c3)nc(n34)sc(n4)C ZINC000077339322  
COc1cccc(c1)-c(nc2C(=O)N)nc(c23)n(c(=O)[nH]3)-c4cccc4OC ZINC000004338385  
OCCNc1nc(-c2cccc2)cc(n1)Nc3cc(Cl)ccc3O ZINC000329031305  
Cn1c(=O)[nH]c(=O)c(c12)n(c(n2)SCCO)Cc3ccc(Cl)cc3 ZINC000013590323  
CCOC(=O)c1ccc(cc1)OC[C@@H](O)Cn(c(=O)cn2)c(c23)cccc3 ZINC000031560648  
COc1cccc1-n(c(=O)[nH]2)c(c23)nc(nc3C(=O)N)-c4cccc4O ZINC000004338395  
CCOc1cc(ccc1O)-c2cc(nn2CCO)-c3cc(O)c(O)cc3O ZINC000257269878  
CCn(c(n1)N)c(c12)ncc(c2)C(=O)NCCn(c[nH]c3=O)c(c34)cccc4 ZINC000077539896  
OC[C@@H](C)Nc1nc(-c2cccc2)cc(n1)Nc3cc(Cl)ccc3O ZINC000329040195  
COc1ccc(cc1O)-c(nc2C(=O)N)nc(c23)n(c(=O)[nH]3)-c4ccc(C)cc4 ZINC000005151752  
Cc1nc(C)c(c(=O)[nH]1)CCC(=O)Nc(cc2)cc(c23)[nH]c(=O)[nH]3 ZINC000012751973  
[nH]1c(=O)[nH]c(c12)cc(cc2)NC(=O)Cn3cc(Br)ccc3=O ZINC000006879289  
c1cccc1[C@@]2(CC)NC(=O)N(C2=O)CC(=O)Nc(cc3)cc(c34)[nH]c(=O)[nH]4  
ZINC000012974894  
OC[C@H](C)Nc1nc(-c2ccnc2)cc(n1)Nc3cc(Cl)ccc3O ZINC000328967501  
COc1cccc(c1)-c2[nH]ncc2C(=O)NCCNc3nc(C)cc(=O)[nH]3 ZINC000091997939  
CCOc1cccc1-n(c(=O)[nH]2)c(c23)nc(nc3C(=O)N)-c4ccc(O)cc4 ZINC000005271228  
COc1cccc(c1)-n(c(=O)[nH]2)c(c23)nc(nc3C(=O)N)-c4cccc(O)c4 ZINC000005271192  
CC(C)Oc1cc(O)cc(c1)C(=O)NCCc2n[nH]c(c23)necc3 ZINC001772700531  
Cc1cc(=O)[nH]c(n1)NCCNC(=O)Cn2ccnc2-c3cccc3 ZINC000221231786  
c1cc(Cl)ccc1-n(c(=O)[n-]2)c(=O)c(c23)n(C)cc3C(=O)NC4CCCC4 ZINC000017149002  
CCn(en1)c(c12)nc(NCCO)nc2Nc3ccc(OC)cc3 ZINC000026533017  
COc1cccc(c1)OC[C@@H](O)CNC(=O)c(cc2)cc(c23)nc([nH]3)CO ZINC000097814854  
COc1cccc(c1O)-c(nc2C(=O)N)nc(c23)n(c(=O)[nH]3)-c4ccc(F)cc4 ZINC000004338236  
[nH]1c(=O)oc(c12)cc(cc2)NC(=O)NCCc3n(c34)CCCCC4 ZINC000096141670  
COc1cc(OC)cc(c12)cc([nH]2)C(=O)OCCc3nc(N)nc(n3)N(C)C ZINC000022835003  
Cc1ccc(cc1)C(=O)NCC(=O)OCC(=O)Nc(cc2)cc(c23)[nH]c(=O)[nH]3 ZINC000012940511  
CC(C)n(c(=O)[nH]1)c(c12)nc(nc2C(=O)N)-c3ccc(Cl)cc3 ZINC000012145938  
c1cc(F)ccc1OC[C@@H](O)Cn(cn2)c(c23)ncnc3N4CCOCC4 ZINC000095397138

Cc1cc(C)c(c(=O)[nH]1)CNC(=O)Cc(n[nH]c2=O)c(c23)cccc3 ZINC000010457650  
CCn(c1=O)c(=O)n(C)c(c12)nc(NC[C@@H](C)O)n2Cc3ccc(C)cc3 ZINC000036693339  
C1CCC1c([nH]n2)nc2NC(=O)CCc(n3)[nH]c(=O)c(c34)cccc4 ZINC000253623955  
Cc1cc(=O)c(c[nH]1)OCC(=O)Nc(cc2)cc(c23)[nH]c(n3)CO ZINC000524735625  
c1cc(Cl)ccc1[C@H](O)C(=O)NCCc(cc2)cc(c23)[nH]c(=O)[nH]3 ZINC000215855213  
COc1cccc(c1O)-c(nc2C(=O)N)nc(c23)n(c(=O)[nH]3)-c4cccc4 ZINC000004176074  
CCn(c(n1)N)c(c12)ncc(c2)C(=O)NCCc(n3)[nH]c(c34)cccc4 ZINC000077438835  
COc1cccc1CCC(=O)OCC(=O)Nc(cc2)cc(c23)[nH]c(=O)[nH]3 ZINC000008328449  
c1cccc(c12)c(C(=O)N)cn2CC(=O)NCCc(cc(F)c3)c(c34)OCOC4 ZINC000048286011  
c1cc(F)ccc1-n(c(=O)[n-]2)c(=O)c(c23)n(C)cc3C(=O)NCCc4cccc4 ZINC000009659632  
NC(=O)COc1c(Cl)cc(cc1OC)CNc(cc2)cc(c23)[nH]c(=O)[nH]3 ZINC000010315371  
COc1ccc(cc1OC)-c(co2)c(=O)c(c23)ccc(O)c3C[NH2+]CCO ZINC000032501413  
[nH]1c(=O)[nH]c(c12)cc(cc2)NC(=O)COc(cc3)cc(c34)CCC(=O)N4 ZINC000025457413  
Oc1cccc1-c(n2)nc(C(=O)N)c(c23)[nH]c(=O)n3-c4cccc(Cl)c4 ZINC000005151508  
c1cccc(c12)nc(n(c2=O)CC(=O)N)COc3ccc(Cl)cc3C(=O)N ZINC000011115668  
c1cc(C)cc(c12)N(CCO2)C(=O)CSc([nH]3)nc(=O)c(c34)[nH]cn4 ZINC000033324835  
CSc1ccc(cc1)[C@@H](O)CNS(=O)(=O)c(cc2)cc(c23)n(c(o3)=O)C ZINC000096103232  
Cc1cc(=O)[nH]c(n1)SCC(=O)Nc(cc2)cc(c23)[nH]c(=O)[nH]3 ZINC000408541063  
COc1ccc(cc1)CCC(=O)OCC(=O)Nc(cc2)cc(c23)[nH]c(=O)[nH]3 ZINC000023080685  
c1c(C)cc(C)c(c12)[nH]c(C)c2CC(=O)NCC3nc(N)nc(n3)N(C)C ZINC000092022345  
O[C@H]1COC[C@@H]1N(C)C(=O)c2cccc(c2)-c(cc3)cc(c34)c(=O)[nH]cn4  
ZINC000426503514  
COc1cccc(c1)CCNC(=O)c2c(C)n(nc2)-c3nc(C)cc(=O)[nH]3 ZINC000035598411  
Cc1cc(=O)[nH]c(n1)S[C@@H](C)C(=O)N(C)Cc(n2)[nH]c(=O)c(c23)cccc3  
ZINC000095378040  
c1cccc(c12)[C@@H](CCO2)NC(=O)Cc(n[nH]c3=O)c(c34)cccc4 ZINC000032722163  
Cc1ccc(o1)CNC(=O)Cn2c(=O)c(CCO)c(C)nc2-c3cccc3 ZINC000067300400  
CC(C)(C)c(c1)[nH]nc1CN(C)Cc(cc2=O)[nH]c(c23)ccc(c3)C(=O)N ZINC000091818690  
c1cc(F)ccc1-n(c(=O)[n-]2)c(=O)c(c23)n(C)cc3C(=O)NC4CCCC4 ZINC000009659627  
Cc([nH]1)nc(c12)cc(cc2)CNC(=O)CCc3c(C)[nH]c(=O)nc3C ZINC000216982593  
c1cccc1[C@H](O)c(nc2C3(C(=O)N)CC3)nn2-c4cccc(F)c4 ZINC000095520060  
[nH]1c(=O)[nH]c(c12)cc(cc2)NC(=O)[C@@H](C)OC(=O)c3ccc(F)cc3N ZINC000018750619  
COc1cccc(c1)-n(c(=O)[nH]2)c(c23)nc(nc3C(=O)N)-c4ccc(C)cc4 ZINC000004940452  
NC(=O)COc1ccc(cc1Cl)/C=N/n(c(=O)[nH]2)c(=O)c(c23)cccc3 ZINC000409358485  
O=C([O-])c1nn(CC=C)c(c12)CC[C@@H](C2)[NH2+]Cc(n3)[nH]c(=O)c(c34)cccc4  
ZINC000067849895  
Cc1cccc(C)c1N2C(=O)C[C@@H](C2=O)Nc(cc3)cc(c34)[nH]c(=O)[nH]4 ZINC000085877582  
Cc1cn(nc1)CC(=O)N[C@H](c2cc(=O)[nH]c(n2)C)Cc(c[nH]3)c(c34)cccc4 ZINC000019239929  
Clc1ccc(cc1N)C(=O)OCC(=O)Nc(cc2)cc(c23)[nH]c(=O)[nH]3 ZINC000012794208  
O=c([nH]1)c(C)c(C)nc1-n(nc2C)c(c2)NC(=O)Cc3ccc(F)cc3 ZINC000007421322  
Cc1ccc(o1)-c(nc2C(=O)N)nc(c23)n(c(=O)[nH]3)CCc4cccc4 ZINC000012145945  
Cc1ccc(o1)-c2nn(-c3cccc(F)c3)cc2C[NH+](CCO)CCO ZINC000072478875  
COc1ccc(cc1O)-c(nc2C(=O)N)nc(c23)n(c(=O)[nH]3)-c4cccc(C)c4 ZINC000005151653  
c1nnn1N[C@@H](c(c(O)c2)ccc2O)c3cc(Cl)ccc3[O-] ZINC000006321276  
O=C([O-])c1nn(C)c(c12)CC[N@@H+](C2)Cc3ccc(o3)-c4[nH]ncc4 ZINC000215432618  
COc1ccc(c(c1)OC)-n(c(=O)[nH]2)c(c23)nc(nc3C(=O)N)-c4ccnc4 ZINC000004518782

Cc1ccc(cc1[N+](=O)[O-])C(=O)OCC(=O)Nc(cc2)cc(c23)[nH]c(=O)[nH]3 ZINC000013637947  
 c1[nH+]ccn1C[C@H](C(C)(C)C)NC(=O)c(cc2)cc(c23)ncn3CCO ZINC000097575015  
 [nH]1c(=O)[nH]c(c12)cc(cc2)NC(=O)[C@H](C)OC(=O)c3ccc(F)cc3N ZINC000007377395  
 CCn(c(n1)N)c(c12)ncc(c2)C(=O)NCc([nH]3)nc(c34)ccc(c4)OC ZINC000077541512  
 c1cccc(c12)[nH]c(n2)CNC(=O)c3ccenc3O[C@@H]4CCOC4 ZINC000240002221  
 COc1ccc(Cl)cc1NC(=O)CSc(n2)[nH]c(c23)nc(N)[nH]c3=O ZINC000005639895  
 Cc1ccc(C)c(c1)NC(=O)CSc([n-]c2=O)nc(c23)n[nH]c3 ZINC000013116786  
 O=c([nH]1)[nH]c(c12)cc(cc2)NS(=O)(=O)c3ccc(F)c(Cl)c3 ZINC000006623468  
 CCOc1cccc1-n(c(=O)[nH]2)c(c23)nc(nc3C(=O)N)-c4cccc4O ZINC000005271226  
 COc1cccc1-n(c(=O)[nH]2)c(c23)nc(nc3C(=O)N)-c4ccc(F)c(F)c4 ZINC000004338368  
 CCn(c(n1)N)c(c12)ncc(c2)C(=O)NCCNC(=O)c3ccc(F)cc3 ZINC000077408327  
 CCn1ncnc1[C@@H](C)NC(=O)Nc(c2)c(OC)cc(c23)[nH]c(=O)[nH]3 ZINC000096164615  
 CCOc1cccc1-n(c(=O)[nH]2)c(c23)nc(nc3C(=O)N)-c4ccenc4 ZINC000005271244  
 CCn(c(n1)N)c(c12)ncc(c2)C(=O)N(C)CCn3cc[nH+]c3C ZINC000077357956  
 COc1cccc(c1)NC(=O)CSc([nH]2)nc(=O)c(c23)[nH]cn3 ZINC000033027571  
 CCOc1cccc1-n(c(=O)[nH]2)c(c23)nc(nc3C(=O)N)-c4cccc(F)c4 ZINC000004940465  
 Cc1cccc(c1)-c(nc2C(=O)N)nc(c23)n(c(=O)[nH]3)C[C@@H]4CCCO4 ZINC000012145911  
 COCCOC(=O)c1c(C)[nH]c(c1C)C(=O)Nc(cc2)cc(c23)[nH]c(=O)[nH]3 ZINC000036391272  
 N1CC(=O)Nc(c12)cc(cc2)-c3nc(nn3CCO)[C@@H](O)c4cccc4 ZINC000096150054  
 s1cc(C)n(c12)c(=O)cc(n2)CSc3nnc(C4CC4)n3CCC(=O)N ZINC000028908392  
 CC(C)(C)c1ncc(c(=O)[nH]1)C(=O)NCCc(n2)[nH]c(=O)c(c23)cccc3 ZINC000082083937  
 COc1ccc(C)cc1-n(c2=O)c(SCC(=O)N)nc(c23)cccc3 ZINC000003492505  
 C1CCCc(c12)n(C)nc2CNS(=O)(=O)c(cc3)cc(c34)[nH]c(o4)=O ZINC000096099197  
 c1cccc(c12)nc(-c(n3)ccn3C)cc2C(=O)Nc4nc(es4)CC(=O)N ZINC000019716381  
 Ce1c(C)sc(c12)nc([nH]c2=O)CCNc3ncnc(c34)[nH]cn4 ZINC001506404029  
 c1nn(C)c(c12)nc(NCCO)nc2NCc3cccc(Cl)c3 ZINC000021930242  
 c1cccc1[C@@H](C)NC(=O)COC(=O)CCc(n2)[nH]c(=O)c(c23)cccc3 ZINC000017949935  
 n1c[nH]c(=O)c(c12)[nH]c(n2)N/N=C/c3ccc(Br)cc3O ZINC000006161162  
 NC(=O)c1ncn(c12)c(C)c(c(n2)C)CCC(=O)Nc(cc3)cc(c34)[nH]c(=O)[nH]4 ZINC000012525618  
 COc1ccc(cc1OC)-c(n2)cc(n23)c(ncc3)N4CCC(C(=O)N)CC4 ZINC000067263486  
 n1cccn1[C@H](CC)c2nc(CC(=O)N)nn2Cc3ccc(C)cc3 ZINC000096136632  
 COc1cccc(c1)CNC(=O)CSc(n2)n(N)c(=O)c(c23)cccc3 ZINC000071327505  
 Ce1n[nH]c(C)c1Cc2nc(nn2CCO)Cc3cccc(Cl)c3 ZINC000828778500  
 C1CCCN(c12)c(=O)n(n2)CCCNc(n3)[nH]c(=O)c(c34)cccc4 ZINC000097995083  
 Ce1cc(=O)[nH]c(n1)S[C@H](C)C(=O)NCc2cccc2-n3ccnc3 ZINC000221421197  
 c1cccc(c12)c(=O)n(c(n2)SCC(=O)N)-c3ccc(F)cc3F ZINC000003464360  
 O=c([nH]1)[nH]c(=O)c(c1C)CCC(=O)NCCc(c[nH]2)c(c23)ccc(F)c3 ZINC000050766460  
 C1CCCc(c12)nn(c(=O)c2)CCNS(=O)(=O)c3cccc(c34)cccc4 ZINC000575617879  
 COc1cccc(c1O)-c(nc2C(=O)N)nc(c23)n(c(=O)[nH]3)C4CCCCC4 ZINC000005151373  
 n1cccc1-c(n2)nc(c(c23)c(C)nn3C)NCCc4nc(C)cc(=O)[nH]4 ZINC000072468826  
 COc1ccc(C)cc1NC(=O)CSc([nH]2)nc(=O)c(c23)[nH]cn3 ZINC000033027551  
 CC(C)(C)c1nc(=O)[nH]c(c1)C(=O)NCc(cc2)cc(c23)[nH]c(=O)[nH]3 ZINC000216043967  
 Ce1nc(C)c(c(=O)[nH]1)CC(=O)NCc(cc2)cc(c23)[nH]c(=O)[nH]3 ZINC000345094490  
 n1cccn1[C@@H](CC)c2nc(CC(=O)N)nn2Cc3ccc(C)cc3 ZINC000096136631  
 Ce1cccc(n1)-n(c2=O)c(S[C@H](C)C(=O)N)nc(c23)cccc3 ZINC000009368719  
 n1c[nH]c(=O)c(c12)[nH]c(n2)N/N=C/c3cc(Br)ccc3O ZINC000006382830

COc1ccc(OC)c(c1)[C@@H](C)NC(=O)Cc(n[nH]c2=O)c(c23)cccc3 ZINC000018204220  
CC(C)Cc1n[nH]/c([nH]1)=N\C(=O)[C@@H]2CC(=O)N(C2)c(n[nH]3)c(c34)cccc4  
 ZINC000095472147  
Fe(c1)cccc1-c(n2)nc(C(=O)N)c(c23)[nH]c(=O)n3-c4cccc4F ZINC000004518709  
CC(C)n(c(=O)[nH]1)c(c12)nc(nc2C(=O)N)-c3cccc(Cl)c3 ZINC000012145941  
OC[C@H]1COCCN1C(=O)c2cccc(c2)-c(cc3)cc(c34)c(=O)[nH]cn4 ZINC000299788375  
c1cccc(c12)C(=O)N[C@@H](C2)c3nc(nn3CCO)-c(c[nH]4)c(c45)cccc5 ZINC000096133536  
COc1cccc1Cc2nn(c(n2)CCC(=O)N)-c3cccc(n3)C ZINC000097495105  
Cc1ccnc(c1)[C@@H](C2CC2)NC(=O)Cn([nH]3)c(=O)c(c34)cccc4 ZINC000097259282  
COc1ccc(cc1OC)Cc(n2)n(CC(=O)N)c(c23)cccc3 ZINC000032497981  
COc1ccc(OC)c(c1)NS(=O)(=O)c(cc2)cc(c23)[nH]c(=O)[nH]3 ZINC000004148342  
Cc1ccc(s1)CN(CCO)C(=O)c(cc(=O)n2)n(c23)ccs3 ZINC000097547524  
COc1cccc1-n(c(=O)[nH]2)c(c23)nc(nc3C(=O)N)-c4cccs4 ZINC000004338401  
Cn1nenc1-c2nc(ncc2C)NCCc(n3)[nH]c(=O)c(c34)cccc4 ZINC000023478862  
Cc1cccc(c1)C(=O)N(CCO)Cc(c2)c(=O)[nH]c(c23)cc4c(c3)OCO4 ZINC000004231128  
Cc(n1)[nH]c(=O)c(c12)CCN(C2)C(=O)c3cc(n[nH]3)-c4cccc4O ZINC000071752127  
c1n[nH]cc1S(=O)(=O)[N-]c(c2=O)cccn2Cc3ccc(F)cc3 ZINC000088547559  
COc1ccc(cc1)CNC(nc(c23)n(C)nc3)nc2NCCCO ZINC000020744634  
COc1ccc(cc1)-c(nc2C(=O)N)nc(c23)n(c(=O)[nH]3)-c4cccc4OC ZINC000004338362  
Cc1cccc(c1)-n(c(=O)[nH]2)c(c23)nc(nc3C(=O)N)-c4cccc4O ZINC000005151664  
Cc1ccc(c(C)c1)OC[C@H](O)Cn(nc2C(=O)N)c(=O)c(c23)cccc3 ZINC000042757594  
N1CC(=O)Nc(c12)cc(cc2)-c3nc(nn3CCO)[C@H](O)c4cccc4 ZINC000096150055  
[nH]1c(=O)[nH]c(c12)cc(cc2)NC(=O)CN3C(=O)CCOc(c34)cccc4 ZINC000012744985  
NC(=O)COc1ccc(cc1OC)CNC(cc2)cc(c23)[nH]c(=O)[nH]3 ZINC000004413442  
Fe1ccc(F)cc1NC(=O)CSc([nH]2)nc(=O)c(c23)[nH]cn3 ZINC000033324894  
c1ccnc(n12)nc(c2)[C@H](CC)NC(=O)CCc(n3)c(=O)[nH]c(c34)cccc4 ZINC000091595595  
Cc([nH]1)nc(c12)ncc(c2)-c3cccc(c3)C(=O)N4CCC[C@H](C4)C(=O)N ZINC000534576676  
O1CCOc(c12)c(ccc2)NC(=O)Cc(n[nH]c3=O)c(c34)cccc4 ZINC000055950795  
CCOc1cccc1-n(c(=O)[nH]2)c(c23)nc(nc3C(=O)N)-c4ccncc4 ZINC000005271247  
N#CCCN(nc1C)c(C)c1CCC(=O)Nc(cc2)cc(c23)[nH]c(=O)[nH]3 ZINC000024049738  
c1cc(F)ccc1-n(n2)c(O)c(c2C)CCC(=O)Nc(cc3)cc(c34)[nH]c(=O)[nH]4 ZINC000016260581  
COc1ccc(cc1F)-c(c2)nc(n23)sc3C(=O)N[C@H](C(=O)N)[C@@H](C)O ZINC000067820619  
COc1ccc(OC)c(c12)[nH]c(c2)C(=O)NCC(=O)N=c([nH]3)[nH]c(c34)cccc4 ZINC000020730073  
c1cccc(c12)c(=O)[nH]c(n2)CN(CC)CC(=O)Nc(cc3)cc(c34)[nH]c(=O)[nH]4  
 ZINC000025480179  
CCc(n1)cc(n(c12)ncn2)N[C@H](CO)Cc(c[nH]3)c(c34)cccc4 ZINC000096429845  
COc1cc(ccc1O)[C@@H](CC(=O)N2)c(c23)c(C)nn3-c(n4)ccc(n45)nnc5 ZINC000033011354  
COc(cc1)cc(c12)[nH]c3c2ncn(c3=O)/N=C/c4cccc(OC)c4O ZINC000002349172  
[nH]1c(=O)[nH]c(c12)cc(cc2)NC(=O)CNC(=O)C3(CCC3)c4cccc4 ZINC000039559621  
Nc(n1)[nH]c(=O)c(c12)nc([nH]2)SCC(=O)Nc3c(Cl)cccc3Cl ZINC000020429052  
Cc1cc(=O)oc(C)c1C(=O)O[C@@H](C)c(n2)[nH]c(=O)c(c23)cccc3 ZINC000026013054  
O=c1[nH]c(=O)n(CC)c(c12)ncc(c2)C(=O)c3cc(F)ccc3O ZINC000002652841  
Cc1ccc(cc1C)-c(nc2C(=O)N)nc(c23)n(c(=O)[nH]3)C[C@@H]4CCCO4 ZINC000012145915  
COc(cc1)cc(c12)[nH]c(=O)c(c2)CN(CCO)C(=O)c3cccc3F ZINC000008716803  
COc1cccc(c1)OC[C@H](O)CNC(=O)c(cc(=O)[nH]2)c(c23)cccc3 ZINC000097730289  
CCSc1nc(N)c(Br)c(n1)Sc2nc(N)nc(c23)[nH]cn3 ZINC000008615351

Cn1c(CO)nnc1[C@@H]2CCC[N@@H+](C2)Cc([nH]c3=O)nc(c34)ccs4 ZINC000253536562  
COc1ccc(O)c(c1)/C=N/n(cn2)c(=O)c(c23)[nH]c4c3cccc4 ZINC000000501417  
c1cc(F)ccc1CCNC(=O)CCc(n2)[nH]c(=O)c(c23)cccc3 ZINC000009577373  
Cn1cc(en1)[C@@H]([C@H]2C[C@@H](O)C2)NC(=O)c(cc(=O)[nH]3)c(c34)cccc4 ZINC000220347321  
[nH]1c(=O)[nH]c(c12)cc(cc2)NC(=O)c3cccnc3O[C@@H]4CCSC4 ZINC000252571735  
c1cc(Cl)ccc1NC(=O)Cn(c(=O)n(c2=O)CCO)c(c23)cccc3 ZINC000071280422  
CCc1noc(n1)CN(CC)C(=O)c(en2)cc(c23)nc(N)n3CC ZINC000077515943  
Fc(c1)cccc1NC(=O)CN(C)C(=O)CCc(n2)[nH]c(=O)c(c23)cccc3 ZINC000012875080  
COc1ccc(cc1)CNC(=O)CCNc2nenc(c23)[nH]cn3 ZINC000012296989  
c1cccc(c12)[C@H](CCO2)NC(=O)CCc(n3)[nH]c(=O)c(c34)cccc4 ZINC000006971386  
CSc1nc(Cl)cc(n1)Sc2nc(N)nc(c23)[nH]cn3 ZINC000008615340  
COc(cc1)cc(c12)c(C)c([nH]2)C(=O)NCCn(c(=O)c(=O)[nH]3)c(c34)cccc4 ZINC000096118493  
[nH]1c(=O)c(=O)[nH]c(c12)cc(cc2)C(=O)N[C@@H](c3cccs3)[C@H]4C[C@@H](O)C4 ZINC000253534854  
C1CCCc(c12)c(C)nc(n2)CCNC(=O)c(c3)c(=O)[nH]c(c34)cccc4 ZINC000215630478  
COc1cccc1-c2n[nH]c(c2)C(=O)NCCc(n[nH]c3=O)c(c34)cccc4 ZINC000077099371  
CCc1ccc(cc1)OCCSc([nH]2)nc(c23)c(N)nc(n3)N ZINC000005285507  
COc1cc(cc(c1)OC)C(=O)NCCNC(=O)c(n2)[nH]c(=O)c(c23)cccc3 ZINC000022470444  
COCCn1ennc1[C@@H](C)NC(=O)c(cc(=O)[nH]2)c(c23)ccc(F)c3 ZINC000824466137  
Cc1nn(c(C)c1)CCC(=O)O[C@H](C)c(n2)[nH]c(=O)c(c23)cccc3 ZINC000011593824  
c1cccc(c12)c(=O)[nH]c(n2)CN(C)CC(=O)Nc(cc3)cc(c34)[nH]c(=O)[nH]4 ZINC000023077525  
c1csc(c1C)C(=O)OCC(=O)Nc(cc2)cc(c23)[nH]c(=O)[nH]3 ZINC000002636591  
COc1ccc(cc1)C(=O)CNC(=O)[C@H]2CC(=O)N(C2)c(n[nH]3)c(c34)cccc4 ZINC000095477470  
c1cccc(c12)nc(C)cc2NC(=O)[C@H](C)n(n3)c(=O)cc(c34)CCC4 ZINC000585150149  
Cc1nn(C)c(C)c1-c2[nH]nc(c2)C(=O)NCCc(n3)[nH]c(c34)cccc4 ZINC000095478685  
c1cnccc1-c2nnc(n2CC)SCC(=O)Nc(cc3)cc(c34)[nH]c(=O)[nH]4 ZINC000006586722  
[nH]1c(=O)[nH]c(c12)cc(cc2)NC(=O)[C@@H]3CCCN3C(=O)c4cccs4 ZINC000008231397  
C1CC1c2nnc(n2CC)S[C@@H](C)C(=O)Nc(cc3)cc(c34)[nH]c(=O)[nH]4 ZINC000007841312  
COc1ccc(C(=O)N)cc1NS(=O)(=O)c(c2)c(C)cc(c23)[nH]c(=O)[nH]3 ZINC000011635243
